# Supplementary material for: The IFIH1-A946T risk variant promotes diabetes in a sex-dependent manner
Source: PubMed Central journal article supplement (PMC10937421; doi:10.3389/fimmu.2024.1349601), 2024-02-29
Supplement: DataSheet_1.pdf [file DataSheet_1.pdf]

Supplementary Material

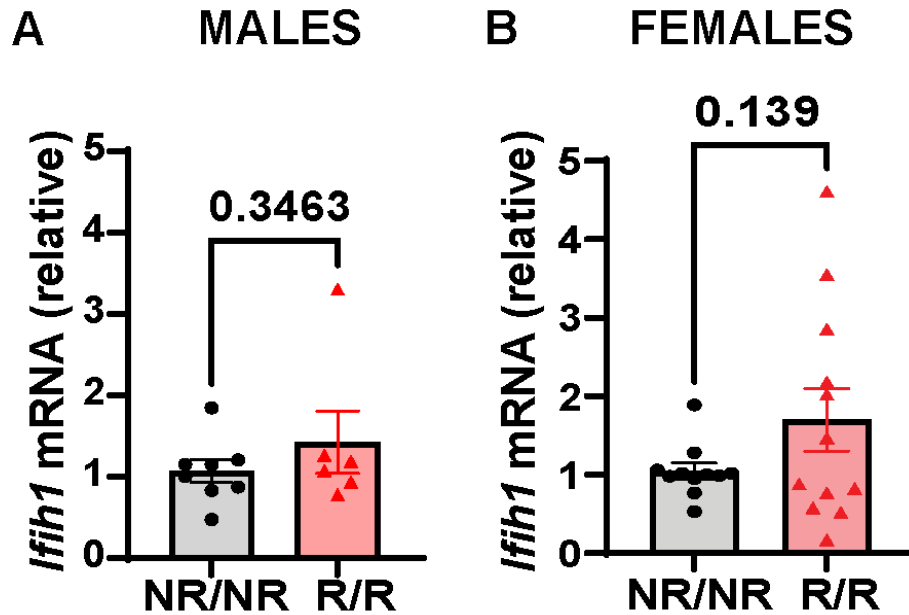

**Supplementary Figure 1.** *NOD.Ifih1<sup>R/R</sup>* mice do not display significant changes in *Ifih1* mRNA in 14-week-old mice. The relative mRNA expression of *Ifih1* in 14-week-old (A) males ( $n=9$  *NOD.Ifih1<sup>NR/NR</sup>*,  $n=6$  *NOD.Ifih1<sup>R/R</sup>*) and (B) females ( $n=11$  *NOD.Ifih1<sup>NR/NR</sup>*,  $n=12$  *NOD.Ifih1<sup>R/R</sup>*). P values were determined using student's unpaired *t* tests. All data are mean  $\pm$  SEM.

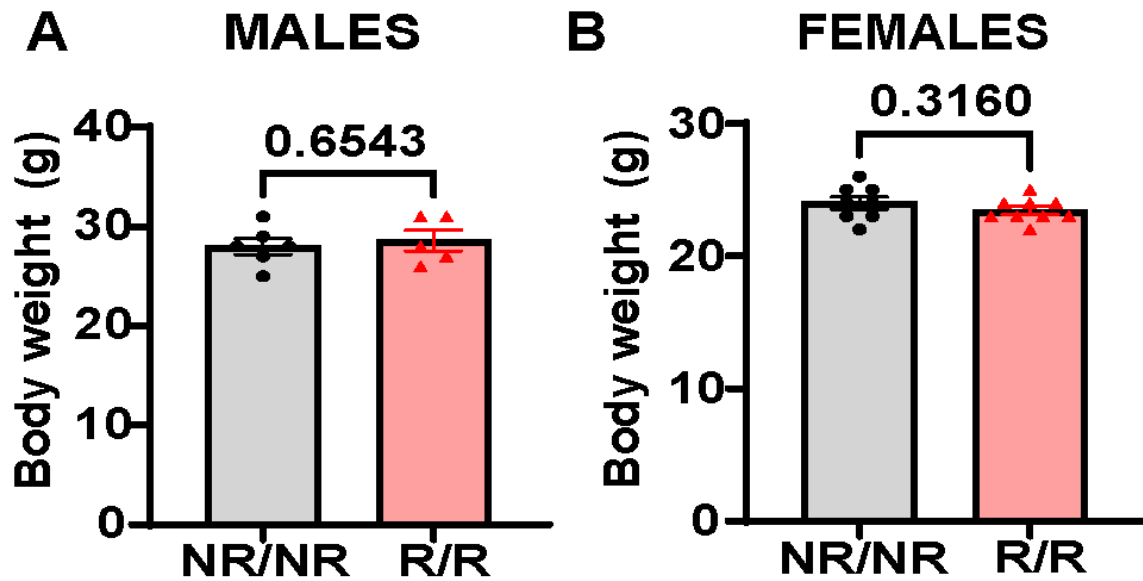

**Supplementary Figure 2. *NOD.Ifih1<sup>R/R</sup>* mice do not display significant changes in body weight.** Body weights measured at a single time point immediately prior to euthanasia in 14-week-old *NOD.Ifih1<sup>NR/NR</sup>* compared to *NOD.Ifih1<sup>R/R</sup>* mice in (A) males ( $n=6$  *NOD.Ifih1<sup>NR/NR</sup>*,  $n=5$  *NOD.Ifih1<sup>R/R</sup>*) and (B) females ( $n=8$  *NOD.Ifih1<sup>NR/NR</sup>*,  $n=9$  *NOD.Ifih1<sup>R/R</sup>*). P values were determined using student's unpaired *t* tests. All data are mean  $\pm$  SEM.

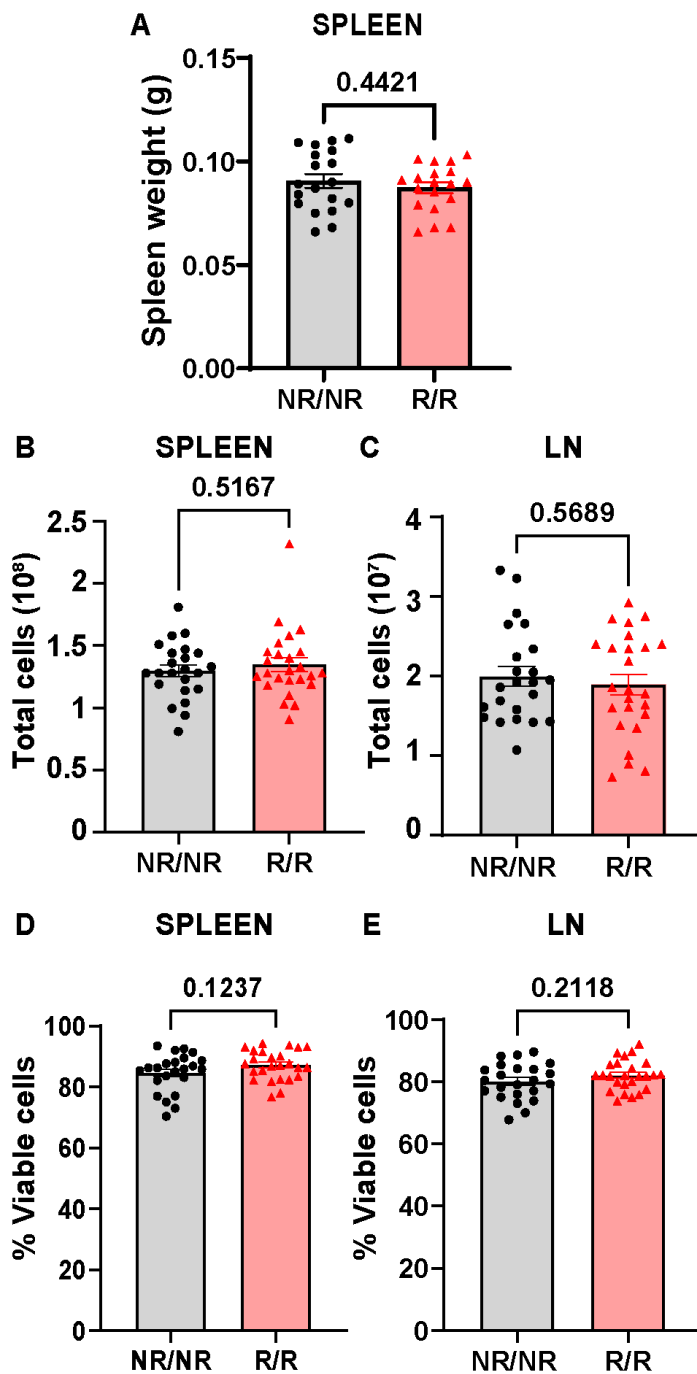

**Supplementary Figure 3. *NOD.Ifih1<sup>R/R</sup>* mice do not exhibit significant changes in splenic weight or cell numbers or viability in spleens or lymph nodes.** (A) Spleen weight in grams (g) measured at the time of euthanasia in 14-week-old *NOD.Ifih1<sup>NR/NR</sup>* compared to *NOD.Ifih1<sup>R/R</sup>* mice ( $n=19$  mice per genotype). (B-C) Total number of cells in (B) spleens ( $n=23$  *NOD.Ifih1<sup>NR/NR</sup>*,  $n=25$  *NOD.Ifih1<sup>R/R</sup>*) and (C) lymph nodes (LN,  $n=23$  *NOD.Ifih1<sup>NR/NR</sup>*,  $n=25$  *NOD.Ifih1<sup>R/R</sup>*). (D-E) Percent viable cells in (D) spleens ( $n=23$  *NOD.Ifih1<sup>NR/NR</sup>*,  $n=25$  *NOD.Ifih1<sup>R/R</sup>*) and (E) lymph nodes ( $n=23$  *NOD.Ifih1<sup>NR/NR</sup>*,  $n=25$  *NOD.Ifih1<sup>R/R</sup>*). P values were determined using student's unpaired *t* tests. All data are mean  $\pm$  SEM.

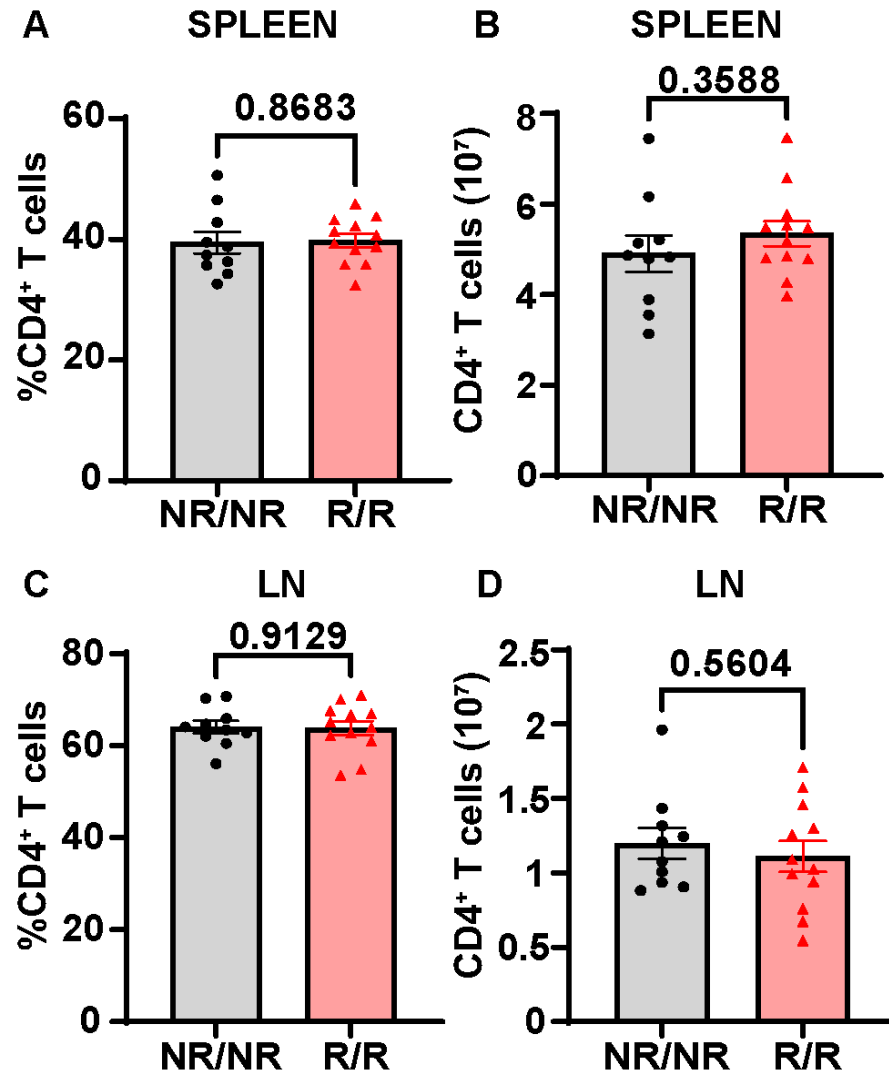

**Supplementary Figure 4.** *NOD.Ifih1<sup>R/R</sup>* mice do not exhibit changes in the frequency or total cell numbers of CD4<sup>+</sup> T cells. (A-B) CD4<sup>+</sup> T cells in the spleen as (A) frequency of live cells and (B) total CD4<sup>+</sup> cell numbers in *NOD.Ifih1<sup>NR/NR</sup>* compared to *NOD.Ifih1<sup>R/R</sup>* mice ( $n=10$  *NOD.Ifih1<sup>NR/NR</sup>*,  $n=12$  *NOD.Ifih1<sup>R/R</sup>*). (C-D) CD4<sup>+</sup> T cells in the lymph nodes (LN) as (C) frequency of live cells and (D) total CD4<sup>+</sup> cell numbers in *NOD.Ifih1<sup>NR/NR</sup>* compared to *NOD.Ifih1<sup>R/R</sup>* mice ( $n=10$  *NOD.Ifih1<sup>NR/NR</sup>*,  $n=12$  *NOD.Ifih1<sup>R/R</sup>*). P values were determined using student's unpaired *t* tests. All data are mean  $\pm$  SEM.

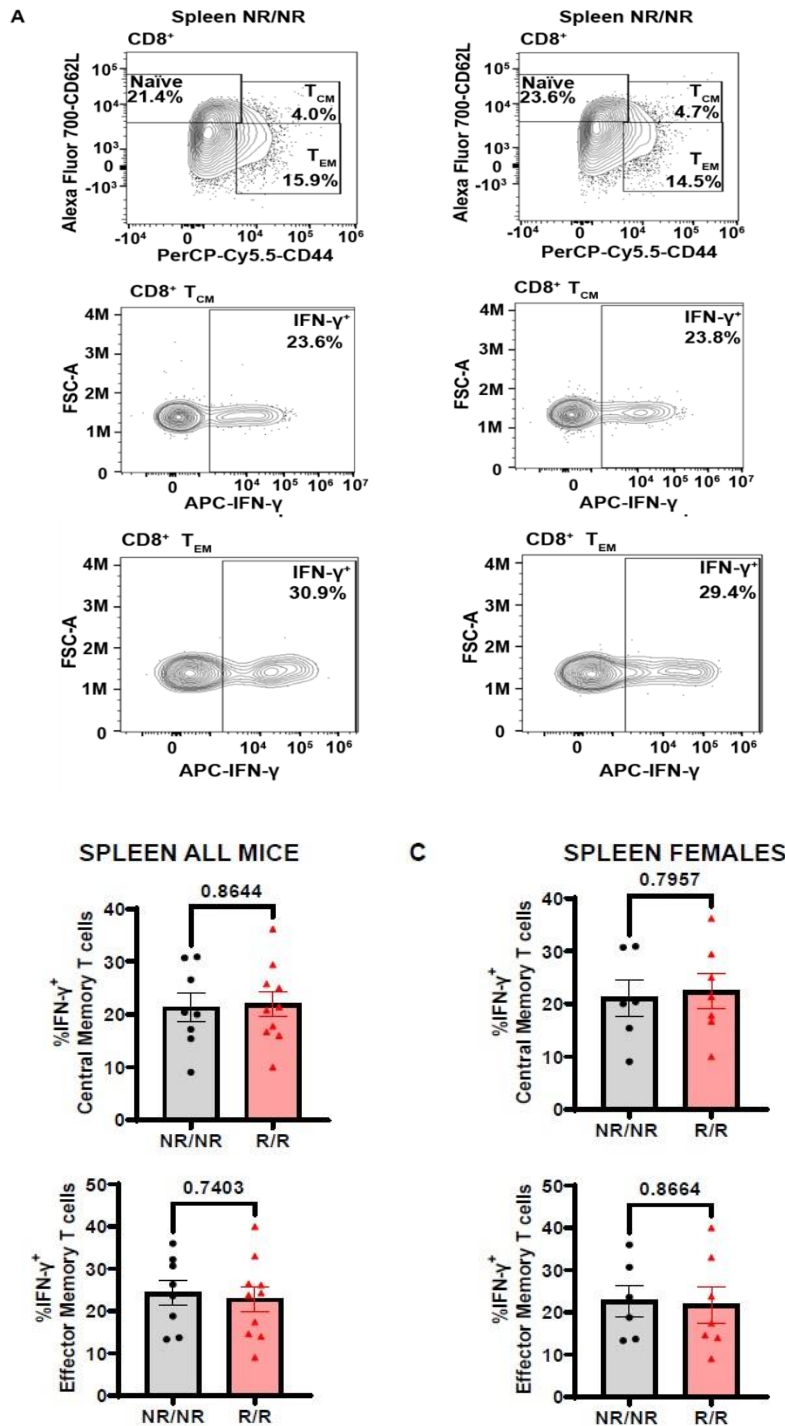

**Supplementary Figure 5.** *NOD.Ifih1<sup>R</sup>* does not affect the frequency of IFN- $\gamma$  on splenic CD8<sup>+</sup> central memory and effector memory T cells. (A) Representative gating of CD8<sup>+</sup> naïve (CD62L<sup>+</sup>), central memory (CD62L<sup>+</sup>CD44<sup>+</sup>, T<sub>CM</sub>), effector memory (CD62L<sup>-</sup>CD44<sup>+</sup>, T<sub>EM</sub>), and IFN- $\gamma$ <sup>+</sup> CD8<sup>+</sup> central memory and effector memory T cells from PMA/ionomycin-treated spleens. (B-C) The frequency of IFN- $\gamma$ <sup>+</sup> CD8<sup>+</sup> central memory and effector memory T cells from PMA/ionomycin-treated lymph nodes from (B) all mice ( $n=8$  *NOD.Ifih1<sup>NR/NR</sup>*,  $n=10$  *NOD.Ifih1<sup>R/R</sup>*) and (C) females only ( $n=6$  *NOD.Ifih1<sup>NR/NR</sup>*,  $n=7$  *NOD.Ifih1<sup>R/R</sup>*). P values were determined using student's unpaired *t* tests. All data are mean  $\pm$  SEM.

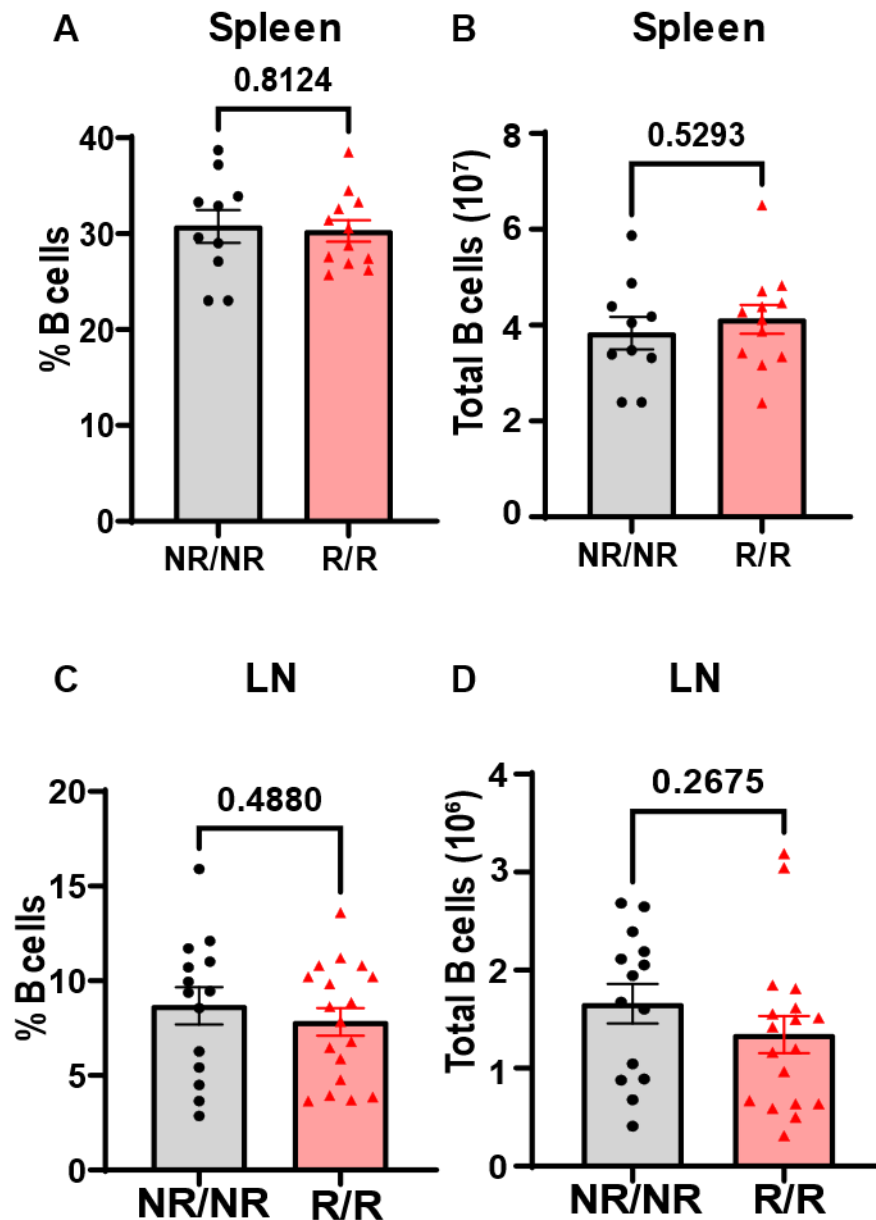

**Supplementary Figure 6.** *NOD.Ifih1<sup>R</sup>* does not affect the frequency or total number of B cells. (A-B) Splenic B cells from 14-week-old mice ( $n=10$  *NOD.Ifih1<sup>NR/NR</sup>*,  $n=12$  *NOD.Ifih1<sup>R/R</sup>*) as (A) frequency of live cells and (B) total number of splenic B cells. (C-D) Lymph node (LN)-derived B cells from 14-week-old mice ( $n=14$  *NOD.Ifih1<sup>NR/NR</sup>*,  $n=18$  *NOD.Ifih1<sup>R/R</sup>*) as (C) frequency of live cells and (D) total number of lymph node B cells. P values were determined using student's unpaired *t* tests. All data are mean  $\pm$  SEM.

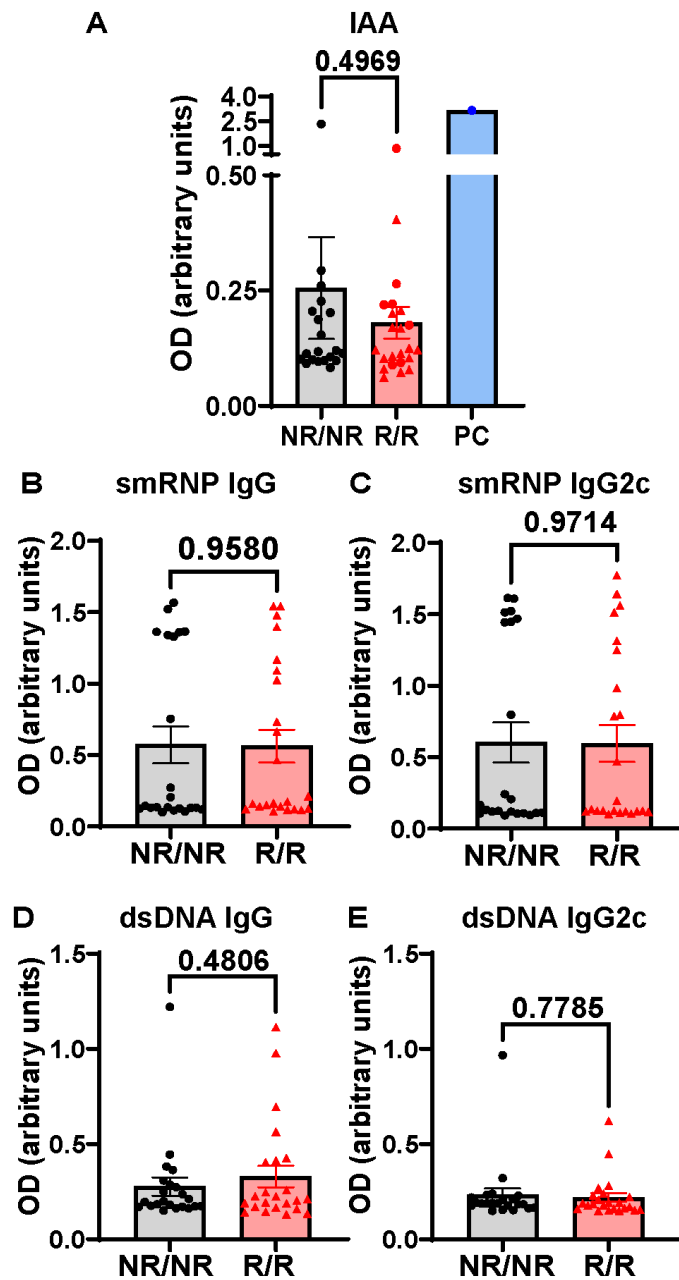

**Supplementary Figure 7. *NOD.Ifih1<sup>R/R</sup>* mice do not display significant changes in insulin, smRNP, or dsDNA autoantibody production.** (A) OD measurements from insulin autoantibody (IAA) ELISAs indicative of the levels of IAA in serum from 14-week-old mice ( $n=20$  *NOD.Ifih1<sup>NR/NR</sup>*,  $n=23$  *NOD.Ifih1<sup>R/R</sup>*). PC: positive control provided by manufacturer. (B-C) OD measurements from smRNP (B) IgG and (C) IgG2c autoantibody ELISAs indicative of the levels of smRNP autoantibody in serum from 14-week-old mice ( $n=22$  *NOD.Ifih1<sup>NR/NR</sup>*,  $n=23$  *NOD.Ifih1<sup>R/R</sup>*). (D-E) OD measurements from dsDNA (D) IgG and (E) IgG2c autoantibody ELISAs indicative of the levels of dsDNA autoantibody in serum from 14-week-old mice ( $n=22$  *NOD.Ifih1<sup>NR/NR</sup>*,  $n=23$  *NOD.Ifih1<sup>R/R</sup>*). P values were determined using student's unpaired *t* tests. All data are mean  $\pm$  SEM.

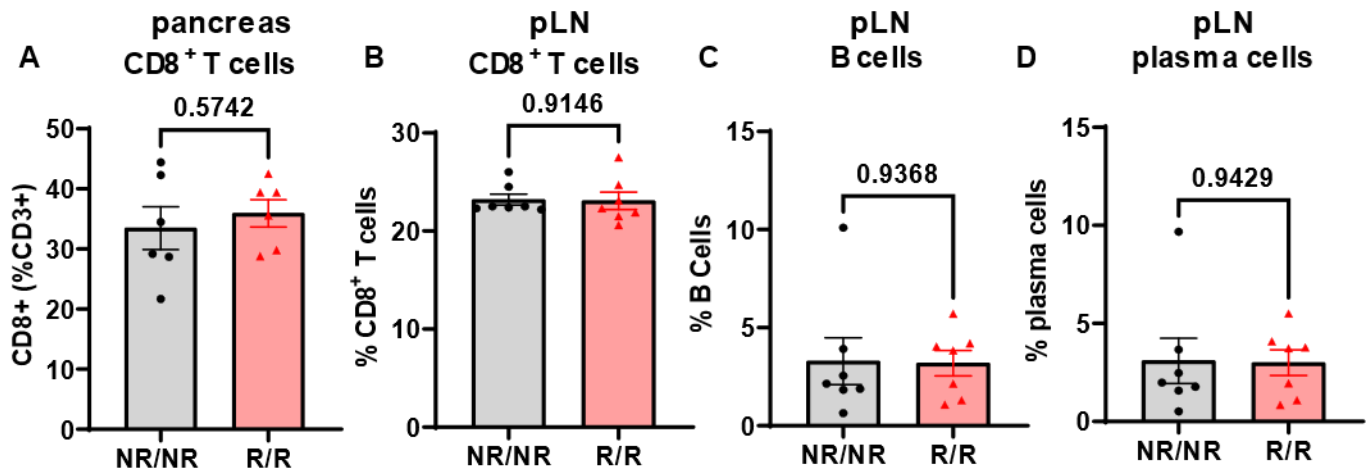

**Supplementary Figure 8.** *NOD.Ifih1<sup>R</sup>* does not affect the frequency of CD8<sup>+</sup> T cells in the pancreas or the frequency of immune cells in the draining lymph nodes of 14-week-old mice. (A-B) The frequency of CD8<sup>+</sup> T cells in the (A) pancreas ( $n=6$  per genotype) and (B) pancreatic lymph nodes (pLN,  $n=7$  per genotype). (C) The frequency of B cells (B220<sup>+</sup>) in the pancreatic lymph nodes ( $n=7$  per genotype). (D) The frequency of plasma cells (CD19<sup>+</sup>B220<sup>-</sup>CD138<sup>+</sup>) in the pancreatic lymph nodes ( $n=7$  per genotype). All data are from 14-week-old mice. P values were determined using student's unpaired *t* tests. All data are mean  $\pm$  SEM.



**Supplementary Table 1. PCR and qRT-PCR Primers**

| <b>Primers for PCR/sequencing</b> |                                         |
|-----------------------------------|-----------------------------------------|
| A946 F1                           | 5'- TTCAAGTGAGTGCAGCAAGA -3'            |
| A946 R1                           | 5'- AGGCAATTCCACCCACTTCT -3'            |
| A946 R2                           | 5'- GTGCACCATCATTGTTCCCC -3'            |
| <b>Primers for qRT-PCR</b>        |                                         |
| <b>Gene/primer</b>                | <b>Sequence</b>                         |
| <i>Hprt</i> -forward              | 5'-TTG CTG ACC TGC TGG ATT ACA-3'       |
| <i>Hprt</i> -reverse              | 5'-CCC CGT TGA CTG ACT GAT CAT TAC A-3' |
| <i>Ifih1</i> -forward             | 5'-AGA TCA ACA CCT GTG GTA ACA CC-3'    |
| <i>Ifih1</i> -reverse             | 5'-CTC TAG GGC CTC CAC GAA CA-3'        |
| <i>Ifit1</i> -forward             | 5'-TGC TGA GAT GGA CTG TGA GG-3'        |
| <i>Ifit1</i> -reverse             | 5'-CTC CAC TTT CAG AGC CTT CG-3'        |
| <i>Mx1</i> -forward               | 5'-GGC AGA CAC CAC ATA CAA CC-3'        |
| <i>Mx1</i> -reverse               | 5'-CCT CAG GCT AGA TGG CAA G-3'         |
| <i>Oas1</i> -forward              | 5' CTT AGC ATG GAG CAC GGA CT-3'        |
| <i>Oas1</i> -reverse              | 5' AGC ACC TTG GAA GCA TCT CTC-3'       |

**Supplementary Table 2. Flow Cytometry Antibodies**

| <b>Antibody</b>                                     | <b>Company</b> | <b>Catalog #</b> |
|-----------------------------------------------------|----------------|------------------|
| BD Horizon™ BUV661 Rat Anti-Mouse CD19              | BD Biosciences | 612971           |
| Brilliant Violet 711™ anti-mouse CD138 (Syndecan-1) | Biolegend      | 142519           |
| Near IR fluorescent reactive dye                    | Thermo Fisher  | L34994 A         |
| Pacific Blue™ anti-mouse/human CD45R/B220           | Biolegend      | 103227           |
| Alexa Fluor® 700 anti-mouse/human CD45R/B220        | Biolegend      | 103232           |
| PE anti-mouse CD80                                  | Biolegend      | 104707           |
| PE/Cy7 anti-mouse CD3ε                              | Biolegend      | 100320           |
| PerCP/Cyanine5.5 anti-mouse CD8a                    | Biolegend      | 100734           |
| Brilliant Violet 711™ anti-mouse CD8                | Biolegend      | 100759           |
| Spark NIR™ 685 anti-mouse CD69                      | Biolegend      | 104557           |
| Spark Violet™ 538 anti-mouse CD4                    | Biolegend      | 100485           |
| APC anti-mouse IFN-γ                                | Biolegend      | 505810           |
| PE-Dazzle 594 anti-mouse IL-10                      | Biolegend      | 505034           |
| PerCP/Cyanine5.5 anti-mouse/human CD44              | Biolegend      | 103032           |
| Alexa Fluor® 700 anti-mouse CD62L                   | Biolegend      | 104426           |
| BD Horizon™ BUV395 Rat Anti-Mouse CD45              | BD Biosciences | 564279           |
